# Supplementary material for: Regulation of Sox2 and stemness by nicotine and electronic-cigarettes in non-small cell lung cancer
Source: Springer Nature journal article supplement (doi:10.1186/s12943-018-0901-2), 2018-10-15
Supplement: MOESM1 [file 16200282]

Additional file 1

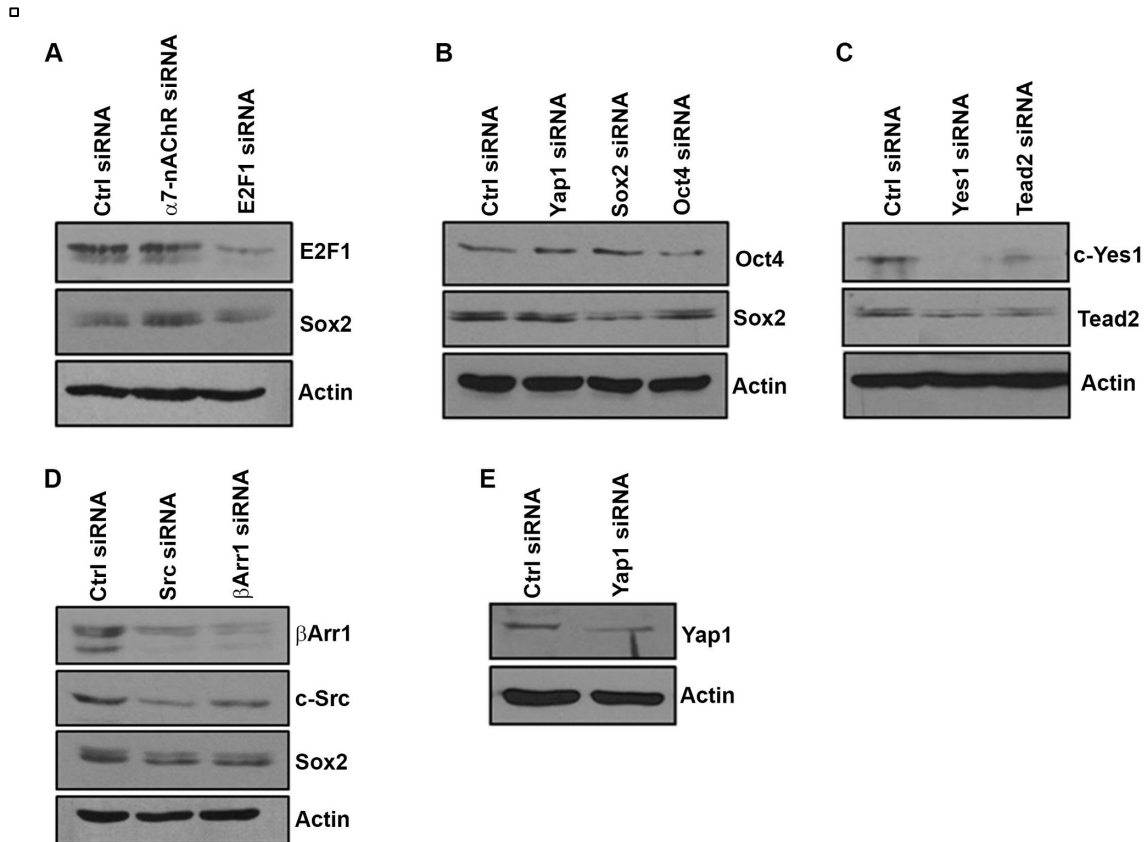

**Figure S1 (A- E).** Transient transfection of siRNA targeting E2F1, Yap1, Oct4, Sox2, or Tead2 to verify that each siRNA could effectively reduce the corresponding protein levels as seen by western blotting. (A) siRNA mediated depletion of E2F1 resulted in reduced expression of E2F1 protein. (B) siRNA mediated depletion of Sox2 or Oct4 resulted in reduced expression of each protein, respectively. (C) siRNA mediated depletion of Yes1 or Tead2 resulted in reduced expression of each protein, respectively. (D) siRNA mediated depletion of Src or beta-Arrestin-1 resulted in reduced expression of each protein, respectively. (E) siRNA mediated depletion of Yap1 resulted in reduced expression of Yap1 protein.
